# Supplementary material for: Randomized, open-label, phase II, biomarker study of immune-mediated mechanism of action of neoadjuvant subcutaneous trastuzumab in patients with locally advanced, inflammatory, or early HER2-positive breast cancer—Immun-HER trial (GOIRC-01-2016)
Source: PubMed Central journal article supplement — J Immunother Cancer. 2023 Nov 28;11(11):e007667. doi: 10.1136/jitc-2023-007667 (PMC10685938; doi:10.1136/jitc-2023-007667), 2023-11-28
Supplement: jitc-2023-007667supp001.pdf [file jitc-2023-007667supp001.pdf]

**Supplementary Table S1.** Grade > 1 Toxicity

| <b>Neoadjuvant Phase</b> |                                                          |                       |                       |                                                          |                       |                       |
|--------------------------|----------------------------------------------------------|-----------------------|-----------------------|----------------------------------------------------------|-----------------------|-----------------------|
| <b>Adverse Event</b>     | <b>FEC Chemotherapy<br/>(total, n = 63)</b>              |                       |                       |                                                          |                       |                       |
|                          | <b><u>Grade 2</u></b>                                    |                       | <b><u>Grade 3</u></b> |                                                          | <b><u>Grade 4</u></b> |                       |
|                          | <b>n (%)</b>                                             |                       | <b>n (%)</b>          |                                                          | <b>n (%)</b>          |                       |
| Alopecia                 | 29 (46)                                                  |                       | 0                     |                                                          | 0                     |                       |
| Neutropenia              | 17 (27)                                                  |                       | 14 (22)               |                                                          | 7 (11)                |                       |
| Leukopenia               | 13 (21)                                                  |                       | 7 (11)                |                                                          | 1 (2)                 |                       |
| Nausea                   | 9 (14)                                                   |                       | 0                     |                                                          | 0                     |                       |
| Fatigue                  | 8 (13)                                                   |                       | 0                     |                                                          | 0                     |                       |
| Erythema                 | 1 (2)                                                    |                       | 0                     |                                                          | 0                     |                       |
| Fever                    | 1 (2)                                                    |                       | 0                     |                                                          | 0                     |                       |
| Vomiting                 | 1 (2)                                                    |                       | 0                     |                                                          | 0                     |                       |
| ALT increased            | 1 (2)                                                    |                       | 0                     |                                                          | 0                     |                       |
| Anemia                   | 1 (2)                                                    |                       | 0                     |                                                          | 0                     |                       |
| Constipation             | 1 (2)                                                    |                       | 0                     |                                                          | 0                     |                       |
| <b>Adverse Event</b>     | <b>Arm A (CIT* + IV Trastuzumab)<br/>(total, n = 31)</b> |                       |                       | <b>Arm B (CIT* + SC Trastuzumab)<br/>(total, n = 32)</b> |                       |                       |
|                          | <b><u>Grade 2</u></b>                                    | <b><u>Grade 3</u></b> | <b><u>Grade 4</u></b> | <b><u>Grade 2</u></b>                                    | <b><u>Grade 3</u></b> | <b><u>Grade 4</u></b> |
|                          | <b>n (%)</b>                                             | <b>n (%)</b>          | <b>n (%)</b>          | <b>n (%)</b>                                             | <b>n (%)</b>          | <b>n (%)</b>          |
| Alopecia                 | 7 (23)                                                   | 0                     | 0                     | 6 (19)                                                   | 0                     | 0                     |

|                                 |                                                   |                       |                       |                                                  |                       |                       |
|---------------------------------|---------------------------------------------------|-----------------------|-----------------------|--------------------------------------------------|-----------------------|-----------------------|
| Neutropenia                     | 1 (3)                                             | 6 (19)                | 3 (10)                | 3 (9)                                            | 6 (19)                | 3 (9)                 |
| Leukopenia                      | 2 (6)                                             | 3 (10)                | 1 (3)                 | 4 (12.5)                                         | 2 (6)                 | 0                     |
| Diarrhea                        | 6 (19)                                            | 1 (3)                 | 0                     | 4 (12.5)                                         | 1 (3)                 | 0                     |
| Mucosal inflammation            | 4 (13)                                            | 1 (3)                 | 0                     | 5 (16)                                           | 0                     | 0                     |
| Fatigue                         | 3 (10)                                            | 2 (6)                 | 0                     | 3 (9)                                            | 0                     | 0                     |
| Anemia                          | 2 (6)                                             | 0                     | 0                     | 0                                                | 0                     | 0                     |
| Erythema                        | 1 (3)                                             | 0                     | 0                     | 2 (6)                                            | 1 (3)                 | 0                     |
| Peripheral neuropathy (sensory) | 1 (3)                                             | 0                     | 0                     | 2 (6)                                            | 1 (3)                 | 0                     |
| Vomiting                        | 0                                                 | 0                     | 0                     | 2 (6)                                            | 0                     | 0                     |
| ALT increased                   | 0                                                 | 0                     | 0                     | 2 (6)                                            | 0                     | 0                     |
| Nausea                          | 0                                                 | 0                     | 0                     | 3 (9)                                            | 0                     | 0                     |
| <b>Adjuvant Phase</b>           |                                                   |                       |                       |                                                  |                       |                       |
|                                 | <b>Arm A (IV Trastuzumab)<br/>(total, n = 31)</b> |                       |                       | <b>Arm B (SC Trastuzumab)<br/>total, n = 32)</b> |                       |                       |
|                                 | <b><u>Grade 2</u></b>                             | <b><u>Grade 3</u></b> | <b><u>Grade 4</u></b> | <b><u>Grade 2</u></b>                            | <b><u>Grade 3</u></b> | <b><u>Grade 4</u></b> |
| <b>Adverse Event</b>            | <b>n (%)</b>                                      | <b>n (%)</b>          | <b>n (%)</b>          | <b>n (%)</b>                                     | <b>n (%)</b>          | <b>n (%)</b>          |
| Fatigue                         | 2 (6)                                             | 0                     | 0                     | 0                                                | 0                     | 0                     |
| Peripheral neuropathy (sensory) | 1 (3)                                             | 1 (3)                 |                       | 1 (3)                                            | 2 (6)                 |                       |
| Alopecia                        | 1 (3)                                             |                       |                       | 1 (3)                                            |                       |                       |
| Neutropenia                     | 0                                                 | 0                     | 0                     | 0                                                | 1 (3)                 | 0                     |
| Anemia                          | 1 (3)                                             | 0                     | 0                     | 0                                                | 0                     | 0                     |
| Erythema                        | 1 (3)                                             | 0                     | 0                     | 0                                                | 1 (3)                 | 0                     |

|                                 |       |       |   |       |       |   |
|---------------------------------|-------|-------|---|-------|-------|---|
| Mucosal inflammation            | 1 (3) | 0     | 0 | 0     | 0     | 0 |
| Peripheral neuropathy (sensory) | 1 (3) | 1 (3) |   | 1 (3) | 2 (6) | 0 |

Abbreviations: FEC, 5-fluorouracil, epirubicin, cyclophosphamide; n, number; %, percentage; ALT, alanine aminotransferase CIT, chemoimmunotherapy.

\*Docetaxel + Pertuzumab
