# Supplementary material for: Randomized, open-label, phase II, biomarker study of immune-mediated mechanism of action of neoadjuvant subcutaneous trastuzumab in patients with locally advanced, inflammatory, or early HER2-positive breast cancer—Immun-HER trial (GOIRC-01-2016)
Source: PubMed Central journal article supplement — J Immunother Cancer. 2023 Nov 28;11(11):e007667. doi: 10.1136/jitc-2023-007667 (PMC10685938; doi:10.1136/jitc-2023-007667), 2023-11-28
Supplement: jitc-2023-007667supp003.pdf [file jitc-2023-007667supp003.pdf]

**Supplementary Figure S1.** Composition of lymphocyte infiltrate in pre-treatment tumor biopsies.
